# Supplementary material for: NiFe-LDH coated NiSe/Ni foam as a bifunctional electrocatalyst for overall water splitting
Source: Royal Society of Chemistry journal article supplement (doi:10.1039/d3re00004d), 2023-01-01
Supplement: d3re00004d1.pdf [file d3re00004d1.pdf]

## Supporting Information

### **NiFe-LDH coated NiSe/Ni foam as a bifunctional electrocatalyst for overall water splitting**

Wentong Wu,<sup>a,b†</sup> Boya Min,<sup>b†</sup> Hanbing Li,<sup>b</sup> Feng Liu,<sup>b</sup> Mingsheng Zheng,<sup>\*a</sup> Kunpeng Ding,<sup>c</sup> Shijian

Lu,<sup>\*d</sup> Maochang Liu<sup>\*b,c</sup>

<sup>a</sup>*School of Chemistry and Biological Engineering, University of Science & Technology Beijing, Beijing 100083, P. R. China.*

<sup>b</sup>*International Research Center for Renewable Energy, State Key Laboratory of Multiphase Flow in Power Engineering, Xi'an Jiaotong University, Xi'an, Shaanxi 710049, P. R. China*

<sup>c</sup>*Gree Altairnano New Energy Inc, Zhuhai, 519040, P. R. China*

<sup>d</sup>*Carbon Neutrality Institute and Jiangsu Key Laboratory of Coal-based Greenhouse Gas Control and Utilization, China University of Mining and Technology, Xuzhou, Jiangsu, 221008, China*

† The two authors contribute equally to this work

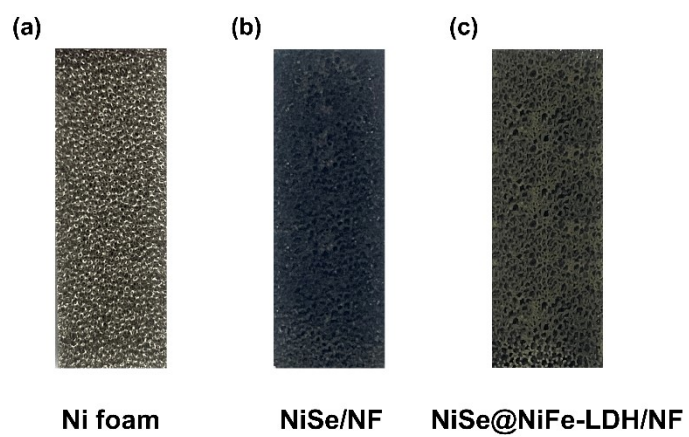

Fig. S1 Digital photos of (a) NF, (b) NiSe/NF, (c) NiSe@NiFe-LDH/NF

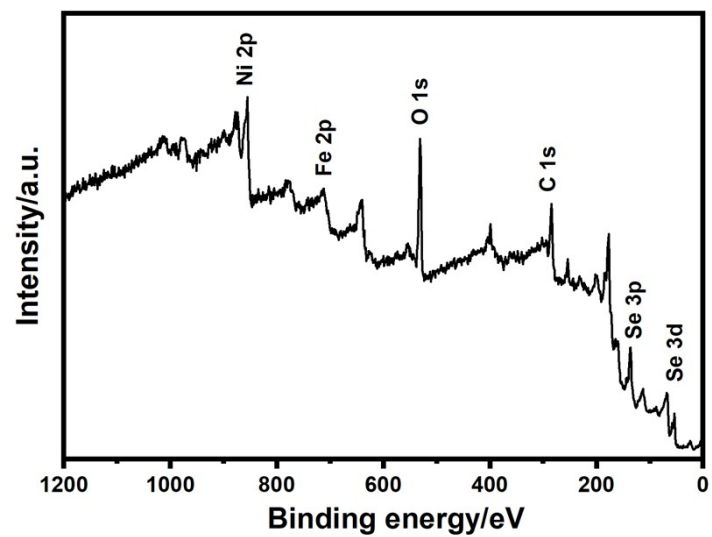

Fig. S2 XPS full spectrum of NiSe@NiFe-LDH/NF

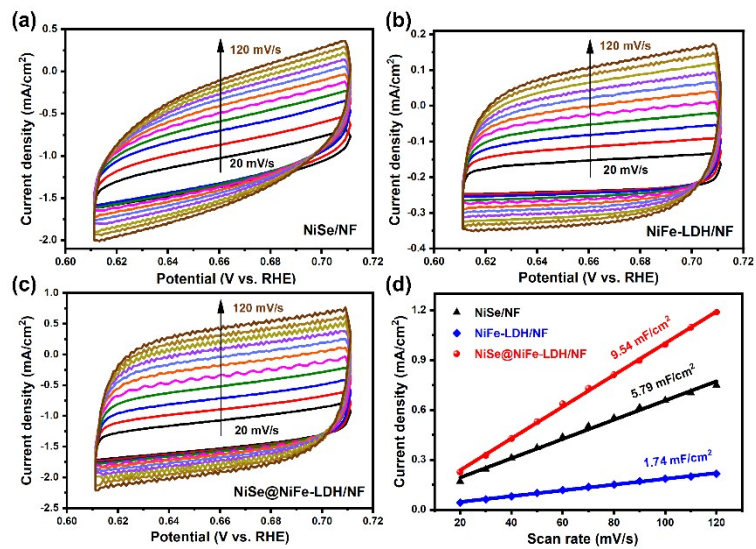

Fig. S3 CV curves at scan rates of 20, 30, 40, 50, 60, 70, 80, 90, 100, 110 and 120 mV·s<sup>-1</sup> of (a) NiSe/NF, (b) NiFe-LDH/NF and NiSe@NiFe-LDH/NF. (d) C<sub>dl</sub> of NiSe/NF, NiFe-LDH/NF and NiSe@NiFe-LDH/NF.

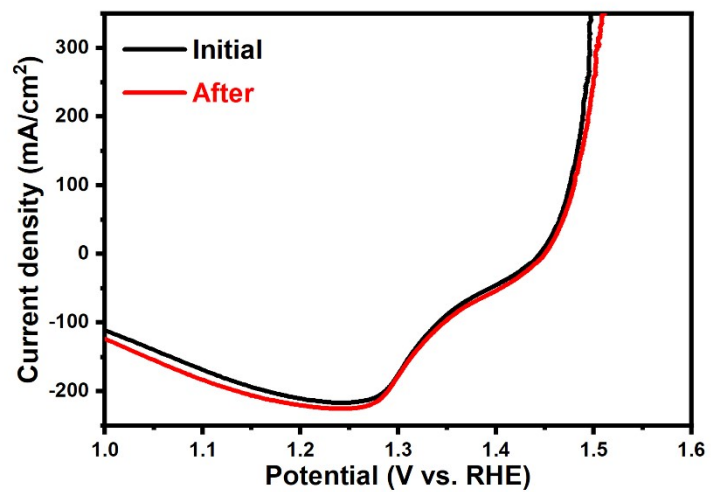

Fig. S4 CV curves of NiSe@NiFe-LDH/NF before and after stability testing for OER.

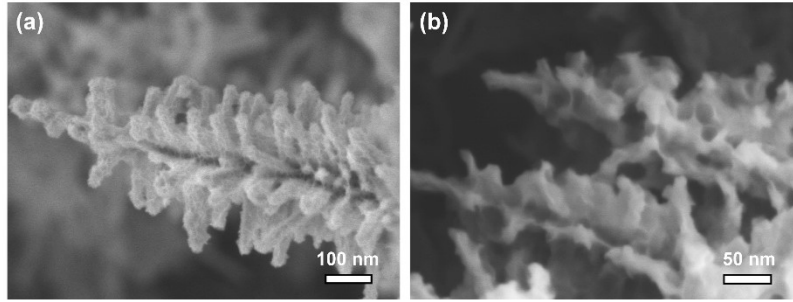

Fig. S5 SEM images of NiSe@NiFe-LDH/NF (a) before and (b) after stability test for OER.

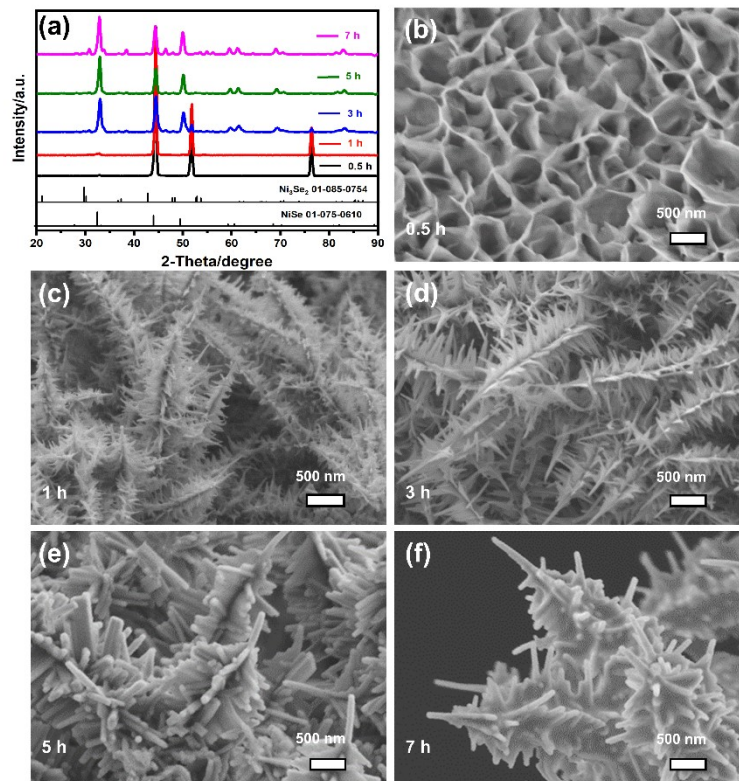

Fig. S6 (a) XRD patterns and (b-f) SEM images of NiSe/NF at different reaction times

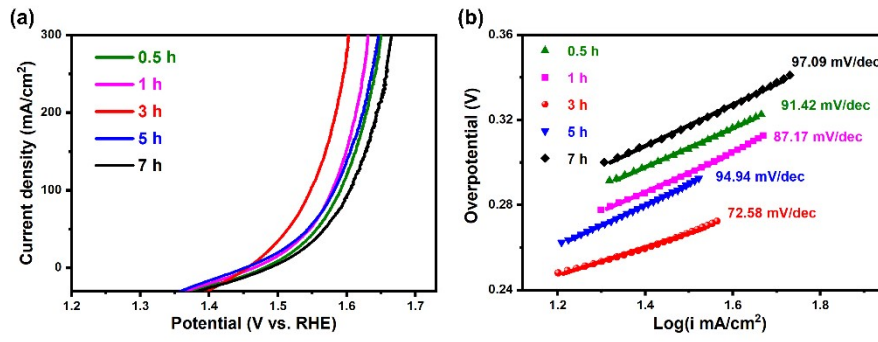

Fig. S7 (a) CV curves and (b) Tafel plots of NiSe/NF at different reaction times



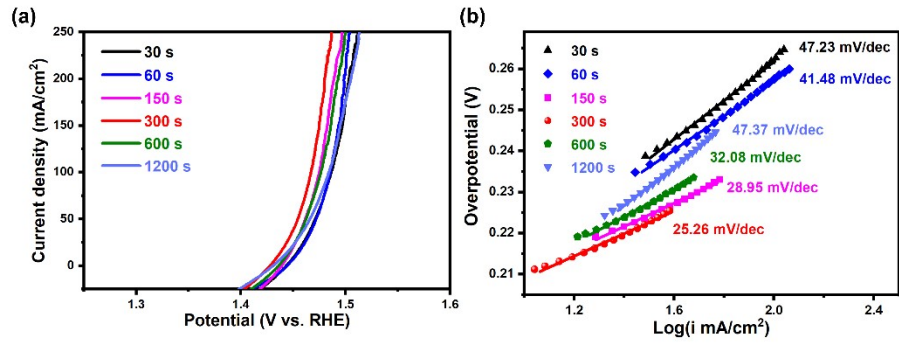

Fig. S8 (a) CV curves and (b) Tafel plots of NiSe@NiFe-LDH/NF at different electrodeposition time.

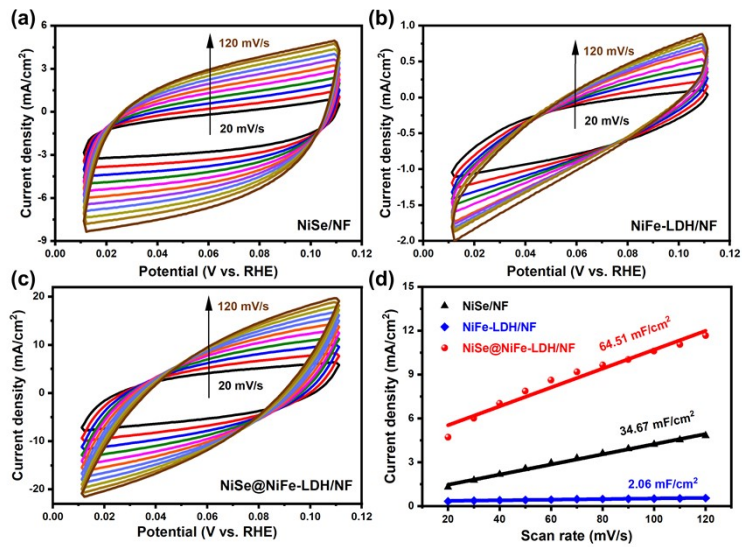

Fig. S9 CV curves at scan rates of 20, 30, 40, 50, 60, 70, 80, 90, 100, 110 and 120  $\text{mV}\cdot\text{s}^{-1}$  of (a) NiSe/NF, (b) NiFe-LDH/NF and NiSe@NiFe-LDH/NF. (d)  $C_{dl}$  of NiSe/NF, NiFe-LDH/NF and NiSe@NiFe-LDH/NF.

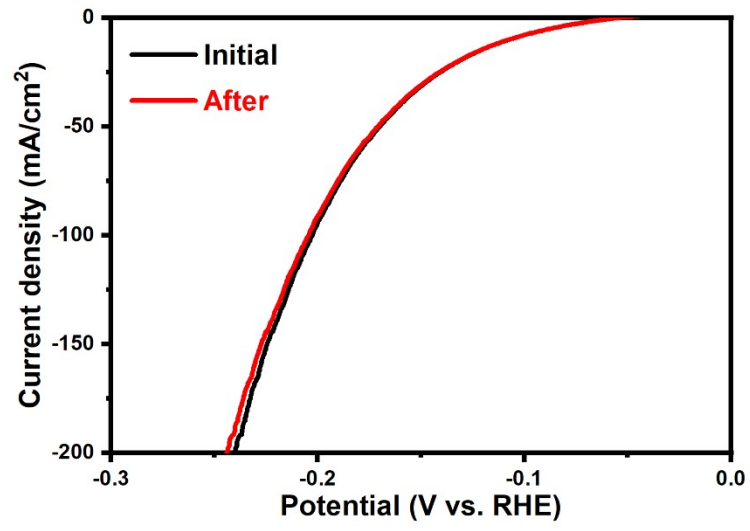

Fig. S10 CV curves of NiSe@NiFe-LDH/NF before and after stability testing for HER.

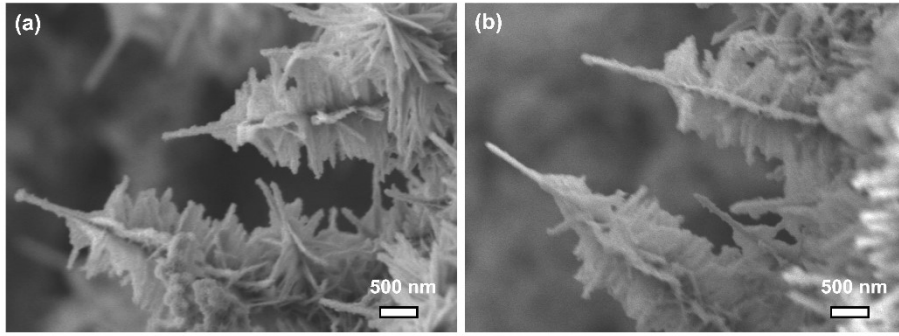

Fig. S11 SEM images of NiSe@NiFe-LDH/NF (a) before and (b) after stability test for HER.

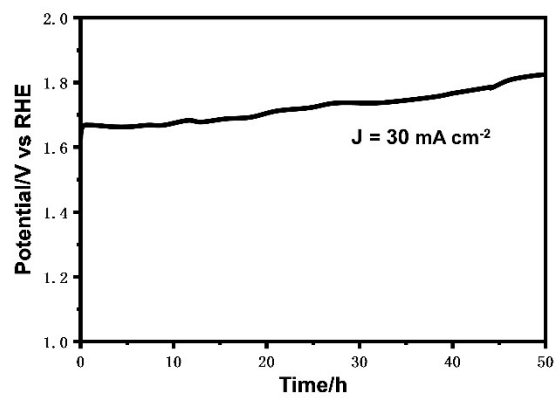

Fig. S12 Chronoamperometric durability test recorded for NiSe /NF//NiSe /NF pairs.

**Table. S1** Comparison of the electrocatalytic performance of NiSe@NiFe-LDH/NF with other recently reported catalysts

| Electrocatalysts                                   | Electrolyte | $\eta_{\text{OER}}$ (mV)@ j<br>(mA cm <sup>-2</sup> ) | $\eta_{\text{HER}}$ (mV)@ j<br>(mA cm <sup>-2</sup> ) | Potential (V) @<br>j (mA cm <sup>-2</sup> ) | Reference |
|----------------------------------------------------|-------------|-------------------------------------------------------|-------------------------------------------------------|---------------------------------------------|-----------|
| NiFe-LDH@NiCoP/NF                                  | 1 M KOH     | 220@10                                                | 120 @ 10                                              | 1.57 @ 10                                   | 1         |
| Ni <sub>3</sub> Se <sub>2</sub> /NF                | 1 M KOH     | 353 @100                                              | 203@10<br>279 @100                                    | 1.612 @ 10                                  | 2         |
| (Ni, Fe)Se@NiFe-LDH/NF                             | 1 M KOH     | 253@100                                               |                                                       |                                             | 3         |
| Co <sub>9</sub> S <sub>8</sub> @NiCo-LDH/NF        | 1 M KOH     | 168@10                                                | 278@30                                                | 1.63@10                                     | 4         |
| NiFe-LDH@Mo-NiS-NiS <sub>2</sub> /NF               | 1 M KOH     | 261@50                                                | 120@10                                                | 1.63@10                                     | 5         |
| FeNi@FeNi/NF                                       | 1 M KOH     | 193@10;<br>231@20;<br>306@50                          | 127@10,<br>173@20, and<br>253@50                      | 1.652@10,<br>1.73@10                        | 6         |
| Ni <sub>3</sub> S <sub>2</sub> @Cu-NiCo-LDH/NF     | 1 M KOH     | 119@10;<br>218@100                                    | 156@10,<br>304@100                                    | 1.75@100                                    | 7         |
| H-CoS <sub>x</sub> @NiFe-LDH/NF                    | 1 M KOH     | 95@10                                                 | 250@10                                                | 1.98@300                                    | 8         |
| MoNi/NiMoOx@NiFe LDH                               | 1 M KOH     | 278@100                                               | 134@100                                               | 1.64@100                                    | 9         |
| Ni(OH) <sub>2</sub> -Ni <sup>iv</sup> acFe-LDHs/NF | 1 M KOH     | 330@100                                               | 116@10                                                | 1.582@100                                   | 10        |
| NiSe@NiFe-LDH/NF                                   | 1 M KOH     | 209@10;<br>241@100                                    | 93@10,<br>213@100                                     | 1.570@10                                    | This work |

## Reference

1. H. Zhang, X. Li, A. Hähnel, V. Naumann, C. Lin, S. Azimi, S. L. Schweizer, A. W. Maijenburg and R. B. Wehrspohn, *Adv Funct Mater* 2018, **28**.
2. R. Xu, R. Wu, Y. Shi, J. Zhang and B. Zhang, *Nano Energy*, 2016, **24**, 103-110.
3. J. Hu, Y. Q. Liang, S. L. Wu, Z. Y. Li, C. S. Shi, S. Y. Luo, H. J. Sun, S. L. Zhu and Z. D. Cui, *Mater Today Nano*, 2022, **17**, 100150.
4. J. Yan, L. Chen and X. Liang, *Sci Bull*, 2019, **64**, 158-165.
5. Y. Li, T. Dai, Q. Wu, X. Lang, L. Zhao and Q. Jiang, *Mater Today Energy*, 2022, **23**, 100906.
6. K. Huang, R. Dong, C. Wang, W. Li, H. Sun and B. Geng, *ACS Sustain Chem Eng*, 2019, **7**, 15073-15079.
7. L. Jia, G. Du, D. Han, Y. Hao, W. Zhao, Y. Fan, Q. Su, S. Ding and B. Xu, *J Mater Chem A*, 2021, **9**, 27639-27650.
8. Y. J. Lee and S.-K. Park, *Small*, 2022, **18**, 2200586.
9. Y. Wu, L. Xu, W. Xin, T. Zhang, J. Cao, B. Liu, Q. Qiang, Z. Zhou, T. Han, S. Cao, W. Xiao and J. Wei, *Electrochim Acta*, 2021, **369**, 137680.
10. W. Mu, D. Bao and C. Chang, *Int J Hydrogen Energy*, 2022, **47**, 15603-15611.
